# Supplementary material
Source: publisher figshare collection journal article supplement (https://acs.figshare.com/ndownloader/files/3622350)
Supplement: Supplementary file 1 [file 3622350]

## Sheet: Intake_Fractions
			Emissions to indoor air				Emissions to outdoor air			Emissions to outdoor water			Emissions to outdoor soil			Pesticide w/ food residue (dynamiCROP)	PiF (UM)	Proportion of emissions to outdoor air	Proportion of emissions to outdoor water
Ref #	CAS #	Common_Name	UCD	ARC	UM	Max	CalTOX	RAIDAR	USETox (0.5*rural+ 0.5*urban)	CalTOX	RAIDAR	USETox	CalTOX	RAIDAR	USETox
1	145742-28-5	(2S,3S)-N-[2-methoxy-5-(trifluoromethoxy)benzyl]-2-phenylpiperidin-3-amine	0.0016656	0.00177707	0.000998786	0.00177707	2.70222e-12	5.28723e-12	5.57688e-13	6.0565e-11	4.46085e-11	3.12626e-12	4.8273e-12	3.02575e-12	3.51553e-14	0.25	0.999997	0.1	0.9
2	87-61-6	1,2,3-TRICHLOROBENZENE	0.00239932	0.00232238	0.00305322	0.00305322	3.70727e-13	1.00413e-12	1.0732e-13	7.19401e-12	1.16221e-11	4.39107e-12	4.98412e-13	5.39363e-12	6.33139e-13	0.25	0.0692544	0.1	0.9
3	95-94-3	1,2,4,5-Tetrachlorobenzene	0.00237788	0.00232985	0.0031494	0.0031494	1.01341e-12	4.27596e-12	2.12371e-13	3.01828e-11	1.15833e-10	1.72288e-11	2.13026e-12	1.1232e-11	1.06894e-12	0.25	0.108129	0.1	0.9
4	2634-33-5	1,2-Benzisothiazolin-3-one	0.00166538	0.00433055	0.00308205	0.00433055	2.86508e-13	8.88032e-13	1.80348e-13	3.45021e-13	3.33822e-13	2.90222e-12	2.31147e-13	1.73074e-12	8.57997e-13	0.240534	0.64451	0.25	0.75
5	528-29-0	1,2-DINITROBENZENE	0.00170536	0.00400142	0.0111921	0.0111921	1.1397e-12	5.30384e-12	4.4011e-13	1.28698e-12	1.61018e-12	8.13352e-12	8.80975e-13	4.74602e-12	1.15094e-12	0.25	0.501266	0.25	0.75
6	102-06-7	1,3-Diphenylguanidine	0.0154316	0.0115535	0.00298974	0.0154316	7.69319e-13	1.80669e-12	2.19689e-13	3.05903e-12	1.54733e-12	7.31245e-12	6.48126e-13	6.01833e-12	3.45578e-13	0.25	0.999965	0.1	0.9
7	106-46-7	1,4-Dichlorobenzene	0.00256231	0.00231274	0.00353418	0.00353418	3.13989e-13	7.95465e-13	9.58448e-14	1.90701e-12	4.50348e-12	2.7312e-12	3.24409e-13	2.37398e-12	3.86676e-13	0.00885223	0.0406604	0.25	0.75
8	2243-62-1	1,5-Diaminonaphthalene	0.00958147	0.0181802	0.00182622	0.0181802	6.59103e-13	1.06741e-13	9.97993e-14	8.91465e-13	9.85256e-13	5.92654e-12	6.70008e-13	3.08188e-12	7.79152e-14	0.25	0.9961	0.1	0.9
9	2971-36-0	2,2-Bis(4-hydroxyphenyl)-1,1,1-trichloroethane (HPTE)	0.00191013	0.00227283	0.0103316	0.0103316	5.93305e-12	5.89932e-12	8.62359e-13	9.67898e-11	1.36204e-11	9.00562e-12	8.08833e-12	7.36636e-12	8.40102e-14	0.25	1	0.1	0.9
10	95-95-4	2,4,5-TRICHLOROPHENOL	0.00241015	0.00358654	0.00795402	0.00795402	2.26697e-12	2.17211e-11	7.04825e-13	1.19526e-11	9.21895e-12	3.01057e-11	1.62352e-12	7.20788e-12	9.96279e-13	0.0821082	0.391302	0.1	0.9
11	88-06-2	2,4,6-Trichlorophenol	0.00239464	0.00317965	0.00491054	0.00491054	2.5717e-12	3.19677e-11	5.41668e-13	1.0281e-11	5.97292e-12	8.588e-12	1.70132e-12	8.36265e-12	1.18074e-12	0.0542911	0.282682	0.1	0.9
12	51-28-5	2,4-Dinitrophenol	0.00206564	0.00335391	0.00796677	0.00796677	9.75172e-13	3.98285e-12	3.32978e-13	1.16451e-12	1.16307e-12	6.92071e-12	7.91406e-13	4.00864e-12	7.23686e-13	0.129181	0.319742	0.1	0.9
13	121-14-2	2,4-DINITROTOLUENE	0.00190494	0.00430185	0.00518293	0.00518293	1.27251e-12	6.01938e-12	4.81512e-13	1.579e-12	2.44976e-12	8.22053e-12	9.30889e-13	5.84683e-12	9.39394e-13	0.25	0.563521	0.1	0.9
14	579-66-8	2,6-Diethylaniline	0.00243457	0.00357144	0.00458898	0.00458898	3.45847e-14	2.69562e-13	5.84836e-14	2.90212e-12	1.82985e-12	6.40968e-12	3.53727e-13	4.2792e-12	5.57168e-13	0.0657918	0.428946	0.1	0.9
15	87-62-7	2,6-Dimethylaniline	0.00238297	0.00235479	0.00292259	0.00292259	5.76148e-15	3.02561e-14	3.18097e-14	4.62012e-13	5.806e-13	3.15928e-12	4.13644e-14	2.34654e-12	3.35538e-13	0.07161	0.057297	0.1	0.9
16	576-26-1	2,6-Dimethylphenol	0.00240491	0.00243494	0.00349245	0.00349245	1.24471e-14	6.11379e-14	3.90846e-14	3.31324e-13	3.32848e-13	1.70675e-12	2.46803e-14	1.43983e-12	7.4225e-14	0.25	0.0564714	0.1	0.9
17	606-20-2	2,6-DINITROTOLUENE	0.00211677	0.00265691	0.00423118	0.00423118	8.29477e-13	3.78442e-12	2.1929e-13	1.5451e-12	2.03563e-12	7.99338e-12	8.05019e-13	5.70599e-12	7.34994e-13	0.25	0.104512	0.1	0.9
18	128-39-2	2,6-Di-tert-butylphenol	0.00236057	0.00400579	0.00469823	0.00469823	7.76748e-13	5.92876e-12	2.00898e-13	6.64232e-11	1.18941e-11	2.06107e-11	6.71398e-12	1.3092e-12	6.58251e-13	0.25	0.620648	0.1	0.9
19	90-04-0	2-Anisidine	0.00236244	0.00241087	0.0263065	0.0263065	1.08244e-14	6.55629e-14	4.26092e-14	3.36508e-13	3.48968e-13	2.72856e-12	6.41964e-14	1.6533e-12	5.37717e-13	0.25	0.0489104	0.1	0.9
20	101-86-0	2-Benzylideneoctanal	0.00211115	0.00307784	0.000717189	0.00307784	2.02964e-13	2.44328e-12	5.84732e-14	9.87368e-12	2.93376e-12	7.02687e-12	7.32715e-13	1.90094e-13	4.67232e-13	0.0485173	0.353488	0.1	0.9
21	1843-05-6	2-Hydroxy-4-(octyloxy)benzophenone	0.0014384	0.00162369	0.0219717	0.0219717	1.29332e-12	3.02484e-12	5.81893e-14	6.01234e-11	1.37637e-12	1.11708e-12	2.04162e-12	4.22068e-15	4.42241e-14	0.24988	0.991711	0.1	0.9
22	99-59-2	2-methoxy-5-nitroaniline	0.00513748	0.0152141	0.0246955	0.0246955	5.92372e-13	1.34111e-12	4.36038e-13	8.55353e-13	8.80035e-13	5.79888e-12	5.71719e-13	3.22837e-12	2.1826e-12	0.25	0.98818	0.1	0.9
23	534-52-1	2-Methyl-4,6-dinitrophenol	0.00179133	0.00246973	0.0172557	0.0172557	6.32099e-13	2.73881e-12	1.58019e-13	1.34158e-12	1.41183e-12	5.93005e-12	6.32282e-13	5.16127e-12	9.59079e-13	0.053741	0.0496042	0.1	0.9
24	95-48-7	2-Methylphenol	0.00243694	0.00292099	0.0259346	0.0259346	2.56321e-14	1.60521e-13	5.2477e-14	2.70614e-13	3.21109e-13	1.958e-12	4.56085e-14	1.30094e-12	9.10603e-14	0.0761553	0.153367	0.1	0.9
25	91-59-8	2-Naphthylamine	0.00207222	0.00476464	0.0198975	0.0198975	4.49877e-14	2.13598e-13	6.84568e-14	8.23536e-13	1.12295e-12	4.4891e-12	2.3978e-13	2.98299e-12	6.54188e-14	0.25	0.723126	0.1	0.9
26	121-00-6	2-tert-Butyl-4-methoxy-phenol	0.00269067	0.00809417	0.0154655	0.0154655	4.05289e-13	2.5115e-12	1.42753e-13	3.23392e-12	1.3816e-12	5.34857e-12	3.31296e-13	1.87011e-12	3.15558e-13	0.25	0.912942	0.1	0.9
27	2144-53-8	3,3,4,4,5,5,6,6,7,7,8,8,8-Tridecafluorooctyl methacrylate	0.00252274	0.0023109	0.008847	0.008847	2.84122e-14	7.81977e-14	4.32095e-14	7.34307e-10	2.67199e-10	1.37185e-12	4.16831e-13	1.05113e-13	1.0889e-13	0.25	0.0868776	0.25	0.75
28	119-90-4	3,3'-Dimethoxybenzidine	0.0185561	0.0124033	0.00303478	0.0185561	5.51352e-13	1.53094e-12	2.28429e-13	9.39597e-13	1.08459e-12	5.90089e-12	5.38739e-13	3.66936e-12	5.53953e-13	0.25	0.999991	0.1	0.9
29	127-51-5	3-Buten-2-one, 3-methyl-4-(2,6,6-trimethyl-2-cyclohexen-1-yl)-	0.00236074	0.00218058	0.00902117	0.00902117	9.10405e-15	2.09471e-14	1.74016e-14	3.23675e-11	1.07202e-11	8.57418e-12	2.14712e-12	1.16981e-12	2.59092e-12	0.00675404	0.161673	0.1	0.9
30	6344-67-8	3-Hydroxyfluorene	0.00276819	0.0113039	0.0029944	0.0113039	3.3461e-13	5.6492e-13	8.91823e-13	3.89548e-12	8.11314e-13	1.0326e-10	3.9068e-13	2.07364e-12	1.28758e-14	0.25	0.981586	0.1	0.9
31	99-08-1	3-Nitrotoluene	0.00241577	0.00243773	0.00199627	0.00243773	3.07653e-13	1.07466e-12	8.15432e-14	7.22429e-13	1.06282e-12	2.40294e-12	2.97948e-13	3.29655e-12	2.70008e-13	0.25	0.0406221	0.9	0.1
32	3739-38-6	3-Phenoxybenzoic acid	0.00482629	0.00836459	0.0052633	0.00836459	5.65092e-13	8.73576e-13	1.66313e-13	3.9467e-12	1.6339e-12	1.58963e-12	3.04776e-13	8.57982e-13	9.68498e-13	0.240346	0.997722	0.1	0.9
33	140-66-9	4-(1,1,3,3-Tetramethylbutyl)phenol	0.00209213	0.00405638	0.00523766	0.00523766	1.14351e-12	8.38449e-12	1.82288e-13	1.0237e-10	5.22457e-12	9.97202e-12	6.84736e-12	6.34215e-13	5.84372e-13	0.151621	0.687057	0.1	0.9
34	94-82-6	4-(2,4-Dichlorophenoxy)butyric acid	0.0035329	0.00683522	0.00160878	0.00683522	6.32155e-13	1.25522e-12	2.46536e-13	3.98421e-12	1.16905e-11	3.21677e-12	4.05228e-13	2.33552e-12	2.33279e-12	0.00945891	0.992997	0.1	0.9
35	80-46-6	4-(2-methylbutan-2-yl)phenol	0.0024117	0.00436042	0.00218214	0.00436042	2.50876e-13	2.62692e-12	1.28e-13	7.4239e-12	2.97857e-12	8.08181e-12	6.64979e-13	1.97603e-12	2.38129e-13	0.0905158	0.548923	0.1	0.9
36	99-71-8	4-(Butan-2-yl)phenol	0.00239344	0.00342437	0.00258004	0.00342437	7.87224e-14	6.62231e-13	7.64922e-14	1.1765e-12	5.82592e-13	2.53609e-12	1.40198e-13	1.68171e-12	6.72294e-14	0.25	0.339733	0.1	0.9
37	838-88-0	4,4'-Methylene bis(2-methylaniline)	0.00846647	0.0086065	0.00276983	0.0086065	1.47086e-12	7.00079e-13	1.55629e-13	8.73415e-12	3.36908e-12	1.01626e-11	1.32392e-12	9.95977e-12	2.63711e-13	0.25	0.999761	0.1	0.9
38	101-61-1	4,4'-methylenebis(N,N-dimethylaniline)	0.00170832	0.00411316	0.0176402	0.0176402	6.03643e-13	1.03332e-12	3.08976e-13	8.87754e-11	2.08837e-11	3.57549e-11	7.2347e-12	9.39654e-12	3.6709e-12	0.25	0.907839	0.1	0.9
39	101-80-4	4,4'-Oxydianiline	0.0224812	0.0213054	0.00630637	0.0224812	5.97401e-13	1.15712e-13	1.02707e-13	8.69067e-13	9.48092e-13	5.9163e-12	5.99107e-13	3.26984e-12	6.16489e-13	0.25	0.999219	0.1	0.9
40	60-09-3	4-Aminoazobenzene	0.00360218	0.0117733	0.0318077	0.0318077	1.04804e-12	9.87174e-13	2.61449e-13	7.47092e-12	4.69157e-12	1.22007e-11	9.27803e-13	6.04902e-12	5.57871e-13	0.25	0.991331	0.1	0.9
41	106-44-5	4-Methylphenol	0.0024143	0.00300192	0.0307662	0.0307662	2.45918e-14	1.59994e-13	5.24558e-14	2.71519e-13	2.71051e-13	1.92071e-12	4.7157e-14	1.29674e-12	5.78051e-14	0.0762378	0.175379	0.1	0.9
42	1806-26-4	4-Octylphenol	0.00182877	0.00406811	8.59763e-05	0.00406811	7.44409e-13	7.82492e-12	9.35357e-14	4.32228e-11	2.13051e-12	5.92797e-12	2.04279e-12	1.11351e-13	7.89534e-14	0.168956	0.736362	0.1	0.9
43	98-54-4	4-tert-Butylphenol	0.00241769	0.00399215	0.00271579	0.00399215	1.40643e-13	1.25946e-12	1.04481e-13	2.33308e-12	7.91943e-13	4.42441e-12	2.65945e-13	2.22273e-12	1.78843e-13	0.0706376	0.475519	0.1	0.9
44	1007-28-9	6-Desisopropylatrazine	0.00264794	0.00899406	0.000440981	0.00899406	1.12356e-12	1.92064e-12	6.49824e-13	1.40328e-12	1.64095e-12	8.48317e-12	1.10538e-12	4.19022e-12	4.09127e-12	0.0137059	0.945597	0.1	0.9
45	148-24-3	8-Hydroxyquinoline	0.00234145	0.0026121	0.00301715	0.00301715	7.64733e-15	5.35065e-14	3.57871e-14	3.16072e-13	2.78977e-13	2.22064e-12	5.83586e-14	1.48915e-12	1.92874e-14	0.0653871	0.151346	0.1	0.9
46	71751-41-2	Abamectin	0.00134359	0.00148474	0.0019058	0.0019058	2.05751e-12	2.61214e-10	4.97472e-12	1.81197e-10	1.3904e-09	1.56209e-10	2.08435e-11	2.38185e-10	3.01287e-11	0.0941478	0.160142	0.1	0.9
47	83-32-9	Acenaphthene	0.00234007	0.00229522	0.00762255	0.00762255	1.56429e-14	6.90126e-14	4.04325e-14	3.42714e-12	5.90752e-13	4.73017e-12	1.12229e-13	1.44103e-12	9.9082e-14	0.00880087	0.0877635	0.1	0.9
48	208-96-8	Acenaphthylene	0.00235239	0.00227189	0.000250253	0.00235239	5.31619e-15	2.10117e-14	2.51672e-14	4.46535e-12	6.98778e-12	4.3535e-12	1.90768e-13	2.3726e-12	1.27698e-13	0.25	0.0997679	0.1	0.9
49	116-06-3	Aldicarb	0.00203069	0.00776482	0.000735533	0.00776482	4.77623e-13	1.371e-12	3.79871e-13	6.43975e-13	6.45556e-13	4.80486e-12	4.47438e-13	2.57318e-12	2.17475e-12	0.142848	0.912907	0.1	0.9
50	309-00-2	Aldrin	0.0019277	0.00223043	0.00301434	0.00301434	1.68008e-12	1.61656e-11	2.10556e-13	8.85605e-10	2.36907e-09	6.53661e-11	4.86782e-11	2.18247e-11	3.79662e-12	0.0117487	0.288342	0.1	0.9
51	101-05-3	Anilazine	0.00304119	0.003976	0.00208608	0.003976	6.49565e-12	1.03724e-11	8.97599e-13	4.78755e-11	8.30629e-11	5.7185e-11	5.01094e-12	3.54616e-11	6.15156e-12	0.244206	0.999271	0.1	0.9
52	120-12-7	Anthracene	0.0014764	0.00250039	0.00574559	0.00574559	1.74213e-13	5.9743e-13	9.79163e-14	2.13326e-11	3.22573e-11	1.83744e-11	3.33199e-12	6.59232e-12	3.33427e-13	0.0403644	0.174524	0.1	0.9
53	1912-24-9	Atrazine	0.00259979	0.011021	0.00152739	0.011021	1.3602e-12	2.01326e-12	4.69164e-13	3.74243e-12	3.54582e-12	1.02179e-11	1.29556e-12	1.08076e-11	4.4303e-12	0.0112095	0.980375	0.1	0.9
54	22781-23-3	Bendiocarb	0.00169729	0.00346027	0.0123253	0.0123253	2.21745e-13	8.26216e-13	1.30239e-13	3.82499e-13	3.54823e-13	2.84458e-12	1.84327e-13	1.80186e-12	2.76124e-13	0.107451	0.371734	0.1	0.9
55	15310-01-7	BENODANIL	0.00244045	0.00428299	0.00551541	0.00551541	1.05877e-12	2.66814e-12	5.64176e-13	3.46596e-12	2.92486e-12	1.46422e-11	9.05936e-13	8.83862e-12	1.75771e-12	0.160204	0.991453	0.1	0.9
56	17804-35-2	Benomyl	0.00652906	0.0070694	0.00778292	0.00778292	1.97896e-13	1.48645e-13	6.74869e-14	4.70392e-13	4.18241e-13	3.15826e-12	1.86829e-13	2.08941e-12	1.64475e-13	0.106348	0.999697	0.1	0.9
57	56-55-3	Benz[a]anthracene	0.0014541	0.00319486	0.00341042	0.00341042	2.34745e-12	7.7376e-12	3.05828e-13	4.63776e-10	1.25504e-11	4.78227e-12	2.9844e-11	1.80902e-12	3.28327e-13	0.115264	0.576119	0.1	0.9
58	92-87-5	Benzidine	0.0124924	0.0209452	0.00120353	0.0209452	7.51823e-13	1.55632e-13	1.18764e-13	1.05272e-12	1.23666e-12	6.51176e-12	7.55613e-13	3.636e-12	1.50189e-13	0.25	0.997789	0.1	0.9
59	205-99-2	Benzo[b]fluoranthene	0.00149046	0.00311352	0.00128502	0.00311352	1.41951e-11	1.76567e-11	6.46341e-13	5.22067e-10	5.656e-11	8.62157e-12	2.72263e-11	1.56074e-12	1.58369e-13	0.239698	0.932911	0.1	0.9
60	119-61-9	Benzophenone	0.00236829	0.00300067	0.00145264	0.00300067	5.47118e-13	4.38567e-12	1.87878e-13	1.45091e-12	4.75302e-13	2.4104e-12	2.80768e-13	1.71316e-12	2.87606e-13	0.0574605	0.220026	0.1	0.9
61	92-52-4	Biphenyl	0.00234565	0.00233878	0.0019682	0.00234565	9.96875e-14	3.78649e-13	6.64402e-14	5.07418e-12	3.3629e-12	3.04254e-12	2.19542e-13	2.24583e-12	3.30831e-13	0.0608177	0.094175	0.25	0.75
62	77-40-7	Bisphenol B	0.00432757	0.00488035	0.00485857	0.00488035	1.43629e-12	1.43004e-12	2.57056e-13	1.6313e-11	2.48504e-12	4.42622e-12	1.22833e-12	2.16523e-12	1.4114e-14	0.25	0.999987	0.1	0.9
63	23184-66-9	Butachlor	0.00166899	0.00296775	0.00135642	0.00296775	1.25747e-12	1.75195e-12	2.30774e-13	3.59603e-11	3.58055e-12	1.28455e-11	2.82967e-12	2.01968e-12	3.26169e-12	0.00770657	0.923107	0.1	0.9
64	35256-85-0	BUTAM	0.00220178	0.00352209	0.00187238	0.00352209	2.4778e-13	1.90616e-12	1.4766e-13	1.88919e-12	7.89971e-13	4.48395e-12	2.97142e-13	2.98796e-12	1.38053e-13	0.0100944	0.39997	0.1	0.9
65	33629-47-9	Butralin	0.00163968	0.00263947	0.000693707	0.00263947	3.08306e-12	1.04499e-11	4.91411e-13	1.50708e-10	1.54332e-11	1.56189e-11	3.17637e-11	1.18519e-11	4.86937e-12	0.11197	0.277839	0.1	0.9
66	94-26-8	Butylparaben	0.00400679	0.0114021	0.00415908	0.0114021	2.64156e-13	9.02933e-13	8.35928e-14	1.03272e-12	1.30971e-13	1.0175e-12	8.8983e-14	4.82713e-13	1.2208e-13	0.246339	0.989677	0.1	0.9
67	63-25-2	Carbaryl	0.00224704	0.0108591	0.00850826	0.0108591	2.73674e-13	6.62794e-13	1.61678e-13	6.70797e-13	5.13566e-13	3.43265e-12	2.09519e-13	2.29902e-12	3.88444e-13	0.0998864	0.967501	0.1	0.9
68	1563-66-2	Carbofuran	0.00210489	0.00936634	0.0196752	0.0196752	3.41553e-13	7.5056e-13	2.16615e-13	8.23309e-13	6.96017e-13	4.35931e-12	2.83155e-13	2.87321e-12	1.66363e-12	0.114251	0.955646	0.1	0.9
69	55285-14-8	Carbosulfan	0.00152135	0.0021392	0.0126911	0.0126911	1.41624e-12	6.66543e-12	1.02731e-12	9.5524e-11	8.81139e-11	1.55559e-10	4.40827e-12	2.41885e-13	4.94837e-13	0.0367651	0.708825	0.1	0.9
70	2921-88-2	Chlorpyrifos	0.00171944	0.00236688	0.00361321	0.00361321	6.97399e-13	6.87943e-12	3.08486e-13	1.30643e-10	1.26454e-10	7.57352e-11	1.57913e-11	4.35402e-12	3.81849e-12	0.0658392	0.217528	0.1	0.9
71	1861-32-1	Chlorthal-dimethyl	0.00158622	0.00252601	8.73629e-05	0.00252601	5.87959e-12	8.15433e-11	8.34472e-13	3.0426e-11	5.63435e-12	6.51874e-12	3.367e-12	5.16653e-12	6.00616e-13	0.00560434	0.135778	0.1	0.9
72	87818-31-3	Cinmethylin	0.00184931	0.00331494	0.00509253	0.00509253	1.49712e-12	5.60447e-12	6.04405e-13	1.22488e-10	6.00076e-11	6.9124e-11	1.08651e-11	7.71541e-12	2.79233e-12	0.00854133	0.754396	0.1	0.9
73	120-32-1	Clorophene	0.00417082	0.00924408	0.0381374	0.0381374	1.01697e-12	1.11149e-12	2.63682e-13	6.83842e-12	1.96947e-12	7.88175e-12	6.89618e-13	3.35329e-12	3.36077e-14	0.246392	0.995398	0.1	0.9
74	91-64-5	Coumarin	0.00228232	0.00340387	0.000386744	0.00340387	1.063e-13	4.90287e-13	8.08221e-14	1.69947e-13	1.60885e-13	1.43296e-12	8.36151e-14	9.93989e-13	1.17775e-13	0.089909	0.31664	0.1	0.9
75	21725-46-2	Cyanazine	0.013758	0.0111595	0.00673006	0.013758	1.63812e-12	5.89415e-12	9.19681e-13	2.92852e-12	3.98342e-12	1.13605e-11	1.56496e-12	1.03359e-11	4.91376e-12	2.79583e-05	0.999938	0.1	0.9
76	533-74-4	Dazomet	0.0021419	0.00752753	0.00234054	0.00752753	3.50142e-13	7.96158e-14	8.67261e-14	5.70443e-13	5.55131e-13	4.46995e-12	4.09173e-13	2.33179e-12	2.42245e-12	0.232918	0.954402	0.1	0.9
77	584-79-2	d-cis,trans-Allethrin	0.00233799	0.00282982	0.00361338	0.00361338	1.2101e-13	1.86641e-13	6.81746e-14	4.328e-11	2.31767e-12	9.26641e-12	3.38656e-12	9.76553e-13	9.02477e-13	0.00127738	0.914734	0.1	0.9
78	134-62-3	DEET	0.00257674	0.00610382	0.0038939	0.00610382	2.63717e-13	9.36912e-13	1.25421e-13	3.94766e-13	4.23762e-13	2.31577e-12	1.31687e-13	1.59478e-12	3.89538e-13	0.0543716	0.802031	0.1	0.9
79	103-23-1	Di(2-ethylhexyl)adipate	0.00162243	0.00137235	0.0202724	0.0202724	9.46068e-12	2.67433e-11	1.06434e-13	1.91413e-11	3.63199e-15	2.41556e-13	6.01425e-13	8.59955e-17	3.6025e-14	0.250226	0.976286	0.1	0.9
80	131-17-9	Diallyl phthalate	0.00230422	0.00326242	0.0212702	0.0212702	1.22684e-13	1.10714e-12	5.51053e-14	6.94956e-13	1.42636e-13	1.19287e-12	7.58938e-14	6.71751e-13	1.40424e-13	0.153671	0.351365	0.1	0.9
81	105-99-7	Dibutyl hexanedioate	0.00238058	0.00271501	0.00376697	0.00376697	5.58345e-13	7.46644e-12	6.55416e-14	1.7108e-12	6.46448e-14	3.39412e-13	1.07367e-13	1.19512e-13	2.35552e-13	0.0443011	0.192395	0.1	0.9
82	7173-51-5	DIDECYL DIMETHYL AMMONIUM CHLORIDE	0.00134227	0.00187934	0.00770506	0.00770506	1.16439e-12	4.65749e-13	8.71757e-14	1.59699e-11	6.02258e-12	5.31979e-13	1.18533e-12	4.89383e-13	2.18259e-15	0.241783	0.998135	0.1	0.9
83	60-57-1	Dieldrin	0.00169201	0.00190961	0.00164295	0.00190961	4.7275e-11	6.8966e-10	9.27467e-12	7.02531e-10	1.19122e-08	6.06768e-10	5.39698e-11	3.00395e-10	5.01659e-11	0.0536537	0.936376	0.1	0.9
84	1445-75-6	DIISOPROPYL METHYLPHOSPHONATE (DIMP)	0.00240865	0.00222749	0.00393811	0.00393811	7.74121e-15	2.95456e-14	3.37039e-14	2.22175e-13	3.46552e-13	1.08009e-12	1.53257e-14	1.36582e-12	2.99273e-13	0.25	0.000853635	0.1	0.9
85	1119-40-0	Dimethyl glutarate	0.00239252	0.00237258	0.00151772	0.00239252	1.53279e-13	8.24752e-13	7.36316e-14	7.38947e-14	6.34022e-14	6.58943e-13	1.00821e-13	5.56382e-13	1.71802e-13	0.0609732	0.0165417	0.1	0.9
86	84-74-2	Di-n-butylphtalate	0.00167202	0.0029481	0.00371948	0.00371948	1.11335e-12	2.0699e-11	8.12599e-14	2.98001e-12	2.36997e-13	1.0304e-12	1.91052e-13	1.35501e-13	1.12709e-13	0.149855	0.377037	0.1	0.9
87	83657-24-3	Diniconazole	0.00177239	0.00267425	0.000824468	0.00267425	5.7104e-14	2.98256e-13	3.3106e-13	5.46127e-11	2.0661e-10	1.30862e-10	5.19231e-12	1.04257e-11	7.93263e-12	0.0497314	0.474374	0.1	0.9
88	117-84-0	Di-n-octyl phthalate	0.00143687	0.00139694	9.80386e-05	0.00143687	1.09436e-11	3.11321e-11	9.07199e-14	1.87572e-11	2.09715e-14	2.46234e-13	5.88383e-13	8.877e-17	2.49117e-14	0.244122	0.875929	0.1	0.9
89	88-85-7	Dinoseb	0.00179883	0.00367712	0.000678101	0.00367712	2.20717e-12	1.89239e-11	6.79992e-13	1.312e-11	2.69816e-12	1.15913e-11	1.70993e-12	9.74435e-12	1.38227e-12	0.0100919	0.466485	0.1	0.9
90	97886-45-8	Dithiopyr	0.00157055	0.00177616	0.00596149	0.00596149	2.94741e-11	7.55299e-12	1.79249e-12	2.43137e-10	8.76718e-12	2.24112e-11	2.31964e-11	1.41539e-11	2.55373e-11	0.000224488	0.984551	0.1	0.9
91	72-20-8	Endrin	0.00169201	0.00190961	0.0251377	0.0251377	4.7275e-11	6.8966e-10	9.27467e-12	7.02531e-10	1.19122e-08	6.06768e-10	5.39698e-11	3.00395e-10	5.01659e-11	0.0172536	0.936376	0.1	0.9
92	563-12-2	Ethion	0.00162414	0.00197814	0.00062591	0.00197814	6.88618e-14	7.76293e-13	7.84904e-14	2.93268e-11	8.22913e-12	1.89135e-11	2.03017e-12	2.88553e-13	1.47997e-13	0.0887132	0.578403	0.1	0.9
93	91-53-2	Ethoxyquin	0.00195169	0.00500622	0.00524851	0.00524851	1.28623e-13	9.22663e-13	1.9445e-13	1.4591e-11	1.67694e-11	2.60449e-11	1.3076e-12	4.39148e-12	1.27543e-12	0.0754507	0.794619	0.1	0.9
94	120-47-8	Ethylparaben	0.00320193	0.0129909	0.000399811	0.0129909	1.60261e-13	7.88868e-13	1.0728e-13	2.65422e-13	1.48131e-13	1.31896e-12	5.98106e-14	8.33487e-13	1.47372e-13	0.242902	0.976873	0.1	0.9
95	97-53-0	Eugenol	0.00234921	0.00248049	0.000574333	0.00248049	1.58142e-14	9.48811e-14	4.44759e-14	3.53243e-13	3.23412e-13	2.06545e-12	4.07264e-14	1.42377e-12	5.78809e-14	0.0388549	0.0740465	0.1	0.9
96	66441-23-4	Fenoxaprop-ethyl	0.00147684	0.00225178	0.00430225	0.00430225	1.95048e-12	1.19636e-12	1.79873e-13	2.95024e-11	1.90225e-12	7.1999e-12	2.26672e-12	1.25875e-12	1.96365e-13	0.00753985	0.953072	0.1	0.9
97	72490-01-8	Fenoxycarb	0.00202864	0.00274315	0.00418308	0.00418308	1.02145e-12	3.33956e-13	1.21273e-13	1.18554e-11	8.35354e-13	4.26004e-12	9.33534e-13	1.13173e-12	7.26322e-13	0.213729	0.999169	0.1	0.9
98	76-87-9	Fentin hydroxide	0.00157888	0.00250087	0.00118715	0.00250087	1.3302e-12	1.32014e-11	4.55123e-13	5.66269e-12	2.72953e-12	1.09213e-11	7.42861e-13	4.15386e-12	2.78717e-15	0.166425	0.109797	0.1	0.9
99	62924-70-3	Flumetralin	0.00158209	0.00222835	0.0268765	0.0268765	1.32902e-11	2.08019e-11	8.42492e-13	5.86071e-10	1.90029e-11	2.17468e-11	6.19211e-11	2.91244e-11	6.07949e-12	0.202368	0.236816	0.1	0.9
100	206-44-0	FLUORANTHENE	0.00155154	0.00371795	0.00701449	0.00701449	2.12863e-12	8.78544e-12	5.88415e-13	1.58624e-10	1.43849e-11	7.39001e-11	2.06187e-11	3.42003e-12	5.42991e-13	0.0828807	0.534882	0.1	0.9
101	59756-60-4	Fluridone	0.00167076	0.00358272	0.000896976	0.00358272	1.49414e-12	1.7967e-12	3.72502e-13	9.22235e-12	1.37878e-11	1.63973e-11	1.97723e-12	1.9882e-11	3.81785e-12	0.00613436	0.860676	0.1	0.9
102	446-72-0	Genistein	0.00651866	0.00625471	0.0029701	0.00651866	1.48371e-13	9.52301e-13	2.40799e-13	7.25328e-13	2.50642e-13	1.9757e-12	1.2536e-13	1.40378e-12	2.34885e-14	0.25	1	0.1	0.9
103	76-44-8	Heptachlor	0.00205877	0.00225274	0.00917744	0.00917744	2.39736e-13	2.23796e-12	5.34676e-14	3.19156e-10	8.15437e-10	6.68379e-11	3.47803e-11	6.53141e-11	5.75938e-12	0.0108429	0.056377	0.25	0.75
104	1024-57-3	Heptachlor epoxide, isomer B	0.00171306	0.00232848	0.00379032	0.00379032	7.81935e-12	2.17016e-10	3.62026e-12	1.22602e-10	3.85257e-09	8.96585e-10	5.14173e-11	3.61358e-10	6.00983e-11	0.0263938	0.03807	0.1	0.9
105	2795-39-3	Heptadecafluorooctanesulfonic acid potassium salt	0.00242732	0.00233627	0.00126062	0.00242732	4.10811e-13	1.17928e-12	1.44151e-13	2.10907e-11	2.28576e-11	1.34249e-11	1.03965e-12	7.71638e-12	6.59265e-13	0.25	0.00177722	0.1	0.9
106	58-89-9	Hexachlorocyclohexane (gamma isomer)	0.00170568	0.00251485	0.00283178	0.00283178	5.98081e-12	4.64461e-11	9.71985e-13	2.8673e-11	3.53575e-10	2.2227e-11	6.51594e-12	3.1108e-11	6.42578e-12	0.017318	0.0998377	0.1	0.9
107	548-62-9	Hexamethyl-p-rosaniline chloride	0.00375651	0.00437221	0.0253416	0.0253416	2.48274e-12	4.7947e-12	5.96713e-13	2.58851e-12	4.88281e-12	7.44553e-13	2.60678e-12	7.40045e-12	2.37414e-15	0.225277	0.352201	0.1	0.9
108	119515-38-7	Icaridin	0.0124056	0.0113814	0.00232598	0.0124056	1.47616e-13	2.52795e-13	9.81093e-14	5.40143e-13	2.9611e-13	2.36764e-12	1.24346e-13	1.50744e-12	6.18274e-13	0.24327	0.999667	0.1	0.9
109	35554-44-0	Imazalil	0.00218242	0.00376191	0.0326042	0.0326042	2.55864e-12	1.39941e-12	4.9643e-13	2.44603e-11	6.03312e-11	4.54275e-11	2.74676e-12	1.36595e-11	1.06306e-12	0.138614	0.989704	0.1	0.9
110	42509-80-8	Isazofos	0.00182484	0.00269088	0.0133699	0.0133699	1.64853e-13	2.39669e-12	1.69554e-13	8.12182e-12	1.44152e-11	2.10075e-11	8.35592e-13	3.25337e-12	2.11003e-12	0.077734	0.274192	0.1	0.9
111	97-54-1	Isoeugenol	0.0031428	0.0102611	0.00107862	0.0102611	1.30243e-13	3.532e-13	6.61637e-14	9.2752e-13	6.68551e-13	2.89196e-12	1.29136e-13	1.28655e-12	1.25983e-13	0.237692	0.952764	0.1	0.9
112	110235-47-7	Mepanipyrim	0.00188463	0.00725153	0.00273828	0.00725153	2.18947e-13	3.04052e-13	1.20635e-13	4.71602e-12	2.81346e-12	8.93597e-12	6.35135e-13	4.75565e-12	3.29136e-13	0.141883	0.95102	0.1	0.9
113	72-43-5	Methoxychlor	0.00185569	0.00238591	0.00300198	0.00300198	3.67224e-12	1.34148e-11	2.67042e-13	1.9891e-10	5.65378e-10	1.12854e-11	1.55089e-11	4.83968e-12	2.13047e-13	0.074045	0.823365	0.1	0.9
114	10605-21-7	methyl 1H-benzimidazol-2-ylcarbamate	0.0228378	0.0217602	0.0054527	0.0228378	2.39928e-13	7.30125e-14	6.54792e-14	4.16823e-13	3.70348e-13	3.15949e-12	2.36323e-13	1.96682e-12	3.17547e-13	0.14016	0.999248	0.1	0.9
115	111-82-0	Methyl laurate	0.00237982	0.00231492	0.0358366	0.0358366	1.04395e-13	3.56526e-13	6.47333e-14	1.85558e-11	3.41521e-13	3.92068e-13	4.53238e-13	6.02205e-14	3.91784e-13	0.00672291	0.251753	0.5	0.5
116	93-15-2	Methyleugenol	0.00235842	0.00245405	0.007366	0.007366	1.8363e-14	1.17941e-13	4.29919e-14	7.97402e-13	1.04953e-12	2.7147e-12	6.54152e-14	1.40584e-12	2.31683e-13	0.0568584	0.0829906	0.1	0.9
117	99-76-3	Methylparaben	0.00366077	0.0115085	0.0201833	0.0201833	1.33366e-13	7.76499e-13	1.08818e-13	1.72848e-13	1.29347e-13	1.2352e-12	5.95771e-14	8.36498e-13	1.69378e-13	0.240878	0.967534	0.1	0.9
118	2385-85-5	Mirex	0.00157475	0.00154215	0.00513173	0.00513173	1.2086e-10	1.7322e-09	4.48187e-12	1.01461e-09	1.38073e-08	9.01373e-11	5.92914e-11	2.12375e-10	4.48636e-12	0.0129972	0.593572	0.1	0.9
119	2212-67-1	Molinate	0.00238325	0.00262173	0.000643821	0.00262173	7.21631e-14	5.30341e-13	7.38451e-14	1.47036e-12	5.28414e-13	2.6185e-12	1.54543e-13	1.90817e-12	1.19844e-12	0.0110105	0.121955	0.1	0.9
120	7378-99-6	N,N-Dimethyloctylamine	0.00246721	0.00223034	0.00476851	0.00476851	7.71536e-15	3.12205e-14	3.32565e-14	1.38059e-12	4.37014e-13	1.06547e-12	3.35074e-14	1.61376e-12	2.63333e-13	0.0082852	0.0421782	0.1	0.9
121	110-26-9	N,N'-Methylenebis(acrylamide)	0.00140733	0.00307648	0.0241636	0.0241636	1.03158e-13	3.31901e-13	7.51373e-14	1.41956e-13	1.28377e-13	1.3095e-12	8.43555e-14	9.69689e-13	4.0042e-13	0.25	0.444405	0.1	0.9
122	91-20-3	Naphthalene	0.00235259	0.00229458	0.00791674	0.00791674	2.72726e-14	1.03754e-13	4.47534e-14	4.79324e-13	8.38244e-13	6.57296e-13	3.11842e-14	5.03757e-13	3.8821e-14	0.0261167	0.0429555	0.1	0.9
123	50-65-7	Niclosamide	0.00158985	0.00215888	0.000253962	0.00215888	1.23829e-11	4.65085e-12	1.0577e-12	1.02867e-10	5.76122e-12	1.7316e-11	8.64065e-12	6.36397e-12	4.13785e-12	0.243555	0.999992	0.25	0.75
124	98-95-3	NITROBENZENE	0.00244213	0.00233133	0.00087503	0.00244213	3.54797e-13	8.90643e-13	6.86376e-14	4.76346e-13	6.51495e-13	1.34802e-12	3.4362e-13	2.2647e-12	3.16892e-13	0.0604763	0.00979962	0.1	0.9
125	924-16-3	N-NITROSODI-N-BUTYLAMINE	0.00234052	0.00236156	0.00237036	0.00237036	2.82476e-14	1.31849e-13	4.77242e-14	4.0092e-13	4.06227e-13	1.54132e-12	3.80089e-14	1.42151e-12	5.1336e-14	0.25	0.0312364	0.25	0.75
126	86-30-6	N-NITROSODIPHENYLAMINE	0.00173532	0.00302936	0.00308178	0.00308178	1.88686e-13	1.46342e-12	1.46605e-13	3.01559e-12	1.53656e-12	5.25884e-12	4.18604e-13	4.63906e-12	1.61934e-13	0.25	0.241055	0.1	0.9
127	101-54-2	N-Phenyl-1,4-benzenediamine	0.00549609	0.0161126	9.52519e-05	0.0161126	6.00914e-13	1.34994e-13	1.05434e-13	1.08573e-12	1.16257e-12	6.39727e-12	6.39372e-13	4.01881e-12	2.90207e-13	0.25	0.992861	0.1	0.9
128	789-02-6	o,p'-DDT	0.00161456	0.0020787	0.0170779	0.0170779	5.07208e-11	6.22371e-10	3.41805e-11	7.93781e-10	5.93774e-09	2.6355e-09	3.84331e-11	2.46324e-11	9.99694e-12	0.207925	0.617357	0.1	0.9
129	26530-20-1	OCTHILINONE	0.00183325	0.0062274	0.017111	0.017111	2.19233e-13	7.18773e-13	9.34474e-14	4.20883e-13	4.18744e-13	2.28515e-12	1.04749e-13	1.35961e-12	5.90461e-14	0.228239	0.81903	0.1	0.9
130	2104-64-5	O-ETHYL O-(P-NITROPHENYL) PHENYLPHOSPHONOTHIOATE	0.00158668	0.00264153	0.0211858	0.0211858	1.12951e-12	4.47919e-12	4.68751e-13	1.08592e-10	1.34206e-11	5.84442e-11	9.54383e-12	3.38551e-12	1.88609e-12	0.0499457	0.650378	0.1	0.9
131	119-93-7	o-Tolidine	0.0145567	0.0151271	8.73935e-05	0.0151271	8.62382e-13	2.59143e-13	1.45936e-13	1.97952e-12	2.5244e-12	1.01258e-11	8.27171e-13	6.69723e-12	2.56638e-13	0.25	0.999206	0.1	0.9
132	19666-30-9	Oxadiazon	0.00153864	0.00245098	0.0107629	0.0107629	8.49571e-12	1.00731e-11	1.33207e-12	1.71557e-10	1.60855e-10	1.03739e-10	1.50985e-11	7.34153e-12	7.50056e-12	0.000251957	0.892029	0.1	0.9
133	23135-22-0	Oxamyl	0.00208843	0.00463705	0.0228629	0.0228629	2.40095e-13	7.05097e-13	1.83017e-13	3.41251e-13	3.22688e-13	2.93216e-12	2.33896e-13	1.72577e-12	1.18378e-12	0.0929855	0.649986	0.1	0.9
134	72-54-8	p,p'-DDD	0.00157086	0.00240806	0.00247582	0.00247582	2.02292e-11	6.27987e-10	4.32283e-11	5.19896e-10	1.97143e-08	2.99779e-09	2.58669e-11	4.70113e-11	1.21618e-11	0.169719	0.515188	0.1	0.9
135	50-29-3	p,p'-DDT	0.00146508	0.00204594	0.000584233	0.00204594	5.38866e-11	1.08195e-09	3.7763e-12	7.98606e-10	9.75877e-09	2.05622e-10	3.846e-11	3.97362e-11	1.88286e-12	0.178831	0.623996	0.1	0.9
136	76738-62-0	Paclobutrazol	0.00343539	0.00440382	0.00101474	0.00440382	1.11351e-12	3.47911e-12	5.32106e-13	5.0145e-12	1.31881e-11	1.62442e-11	8.71449e-13	8.3522e-12	2.15053e-12	0.0211189	0.999112	0.1	0.9
137	56-38-2	PARATHION	0.00163067	0.0030931	0.03863	0.03863	1.97636e-13	2.16987e-12	1.17765e-13	8.50333e-12	2.49442e-12	7.44046e-12	8.60438e-13	2.99067e-12	4.76559e-13	0.0538285	0.485441	0.1	0.9
138	120-71-8	p-Cresidine	0.0024326	0.00348232	0.0208007	0.0208007	2.0402e-14	1.20185e-13	5.25612e-14	4.50437e-13	4.4798e-13	3.23002e-12	1.55793e-13	1.9959e-12	6.84412e-13	0.25	0.432713	0.1	0.9
139	87-86-5	Pentachlorophenol	0.0019903	0.00306316	0.00295784	0.00306316	3.74605e-11	9.65139e-12	1.95575e-12	3.40573e-10	1.18054e-11	6.23288e-11	2.65681e-11	5.34189e-12	8.18444e-12	0.225674	0.992349	0.1	0.9
140	3825-26-1	Pentadecafluorooctanoic acid	0.00246085	0.00233333	0.00295528	0.00295528	3.07886e-13	7.88793e-13	8.87999e-14	4.85276e-11	9.58797e-11	8.22201e-13	8.44996e-13	1.63327e-12	3.39028e-13	0.25	0.0105407	0.1	0.9
141	335-76-2	Perfluorodecanoic acid	0.00239211	0.00233623	0.00295715	0.00295715	3.498e-13	7.96036e-13	9.64223e-14	8.21215e-10	8.13951e-09	2.03696e-09	1.08968e-12	1.96021e-12	1.30211e-12	0.25	0.022578	0.1	0.9
142	375-85-9	Perfluoroheptanoic acid	0.0023609	0.00233141	0.00295912	0.00295912	2.90857e-13	7.93679e-13	8.90668e-14	8.78862e-12	1.59077e-11	8.61529e-12	4.39205e-13	2.6646e-12	5.58043e-13	0.25	0.00722092	0.1	0.9
143	307-24-4	Perfluorohexanoic acid	0.00256968	0.00232902	0.00295663	0.00295663	2.85852e-13	7.91853e-13	8.80615e-14	2.12837e-12	4.7268e-12	2.54897e-12	3.22516e-13	3.3194e-12	5.28483e-13	0.25	0.0048349	0.1	0.9
144	375-95-1	Perfluorononanoic acid	0.00236164	0.00233491	0.0029701	0.0029701	3.20469e-13	7.92334e-13	9.1635e-14	3.15829e-10	1.08021e-09	5.67566e-10	1.05752e-12	1.25657e-12	8.01763e-13	0.25	0.0155025	0.1	0.9
145	1763-23-1	Perfluorooctane sulfonic acid	0.00242732	0.00233627	0.00315431	0.00315431	4.10811e-13	1.17928e-12	1.44151e-13	2.10907e-11	2.28576e-11	1.34249e-11	1.03965e-12	7.71638e-12	6.59265e-13	0.25	0.00177722	0.1	0.9
146	754-91-6	Perfluorooctanesulfonamide	0.002383	0.00233628	0.00295784	0.00295784	4.13536e-13	8.75004e-13	7.67788e-13	6.0917e-10	7.85377e-10	2.80684e-10	9.8676e-13	1.00342e-12	9.6501e-13	0.25	0.0158401	0.75	0.25
147	335-67-1	Perfluorooctanoic acid	0.00246085	0.00233333	0.00295273	0.00295273	3.07886e-13	7.88793e-13	8.94227e-14	4.85276e-11	9.58797e-11	5.06306e-11	8.44996e-13	1.63327e-12	6.27912e-13	0.25	0.0105407	0.1	0.9
148	2058-94-8	Perfluoroundecanoic acid	0.00242936	0.00233736	0.00168005	0.00242936	4.40092e-13	7.75512e-13	9.84921e-14	9.52643e-10	2.34098e-08	2.49165e-09	1.15992e-12	3.28181e-12	1.3264e-12	0.25	0.0325307	0.1	0.9
149	484-17-3	Phenanthren-9-ol	0.00452772	0.0106226	0.0148075	0.0148075	3.5103e-13	1.2251e-13	6.7974e-14	6.9422e-12	1.00834e-12	3.88055e-12	5.74234e-13	1.75856e-12	2.11019e-14	0.25	0.995899	0.1	0.9
150	77-09-8	Phenolphthalein	0.00404126	0.00458914	0.00082157	0.00458914	1.99049e-13	1.47287e-12	3.07485e-13	5.77378e-13	4.73966e-13	1.29966e-12	1.78971e-13	2.16267e-12	6.16741e-16	0.237461	1	0.1	0.9
151	122-99-6	Phenoxyethanol	0.0024466	0.00373532	0.000901406	0.00373532	1.01724e-13	4.1958e-13	7.11791e-14	1.19879e-13	1.06828e-13	1.05625e-12	6.20199e-14	7.80435e-13	3.29589e-13	0.12978	0.429797	0.1	0.9
152	298-02-2	PHORATE	0.00214727	0.00220531	0.00282673	0.00282673	1.49795e-14	1.46521e-13	3.0766e-14	2.22687e-12	1.72171e-12	4.47849e-12	1.96199e-13	1.3575e-12	3.60433e-13	0.0259583	0.0716699	0.1	0.9
153	732-11-6	Phosmet	0.00165353	0.00376905	0.000607688	0.00376905	1.42623e-13	2.06387e-13	8.77173e-14	8.92471e-13	2.06827e-12	3.09417e-12	1.93874e-13	2.35076e-12	2.9598e-12	0.0370412	0.79245	0.1	0.9
154	85532-75-8	PK 11195	0.00165912	0.00175143	0.000173302	0.00175143	6.87887e-12	2.31321e-12	8.70699e-13	1.76766e-10	2.29718e-11	2.37861e-11	1.00821e-11	9.25071e-13	1.53617e-13	0.25	1	0.1	0.9
155	23103-98-2	Pirimicarb	0.00215938	0.00901597	0.00220794	0.00901597	5.82653e-13	1.74247e-13	1.3603e-13	1.05101e-12	9.68718e-13	6.42191e-12	6.58446e-13	3.72057e-12	2.5745e-12	0.112995	0.95573	0.1	0.9
156	29420-49-3	Potassium nonafluoro-1-butanesulfonate	0.00234971	0.00233004	0.00298114	0.00298114	3.90293e-13	1.18971e-12	7.91855e-14	8.64631e-13	3.12031e-12	3.02168e-12	4.10268e-13	6.16049e-12	1.00355e-12	0.25	0.000966241	0.1	0.9
157	3871-99-6	POTASSIUM PERFLUOROHEXANESULFONATE	0.00241545	0.00233329	0.00296107	0.00296107	3.60105e-13	1.25048e-12	1.11423e-13	1.4707e-12	4.003e-12	1.91637e-12	4.14337e-13	1.41226e-11	6.59975e-13	0.25	0.00086807	0.1	0.9
158	67747-09-5	Prochloraz	0.0016082	0.00243034	0.00114265	0.00243034	2.53756e-12	5.22258e-12	1.57444e-12	4.81416e-11	3.11117e-10	1.6691e-10	4.72986e-12	2.53362e-11	9.91911e-12	0.13974	0.875251	0.1	0.9
159	29091-21-2	Prodiamine	0.00155836	0.0025156	0.00021692	0.0025156	1.90764e-12	1.04556e-11	6.45176e-13	6.91023e-11	1.57106e-11	3.03203e-11	1.29508e-11	9.25411e-11	4.59279e-12	0.00481357	0.170513	0.1	0.9
160	25606-41-1	Propamocarb hydrochloride	0.00288818	0.00738459	0.0324789	0.0324789	3.41654e-13	2.21139e-13	1.05101e-13	5.59229e-13	5.22003e-13	4.30695e-12	3.78436e-13	2.33756e-12	4.0191e-13	0.00622394	0.911872	0.1	0.9
161	34590-94-8	Propanol, 1 (or 2)-(2-methoxymethylethyoxy)-	0.00266629	0.00429976	0.0312214	0.0312214	2.59574e-13	4.94726e-13	1.4756e-13	3.59075e-13	3.40912e-13	3.06347e-12	2.47759e-13	1.77528e-12	1.26518e-12	0.217403	0.726423	0.1	0.9
162	139-40-2	Propazine	0.00221868	0.00881954	0.00272398	0.00881954	1.59853e-12	2.27292e-12	4.5803e-13	6.57418e-12	5.65632e-12	1.34612e-11	1.61662e-12	1.50249e-11	5.21084e-12	0.0103991	0.97233	0.1	0.9
163	94-13-3	Propylparaben	0.00393749	0.0131919	0.0288837	0.0288837	2.18604e-13	8.61816e-13	1.07163e-13	6.05446e-13	1.75226e-13	1.44156e-12	8.02848e-14	8.27845e-13	1.63025e-13	0.244914	0.985056	0.1	0.9
164	129-00-0	PYRENE	0.00150094	0.00325925	0.00265213	0.00325925	9.70107e-13	3.37768e-12	2.76111e-13	8.93163e-11	4.21474e-11	2.86621e-11	2.15976e-11	8.54063e-12	4.59711e-13	0.0508504	0.392584	0.1	0.9
165	91-22-5	Quinoline	0.00236203	0.00268386	0.00748011	0.00748011	7.79558e-14	4.43141e-13	7.27572e-14	3.67533e-13	3.31311e-13	2.27288e-12	9.00765e-14	1.67707e-12	3.65314e-14	0.0187135	0.0980953	0.1	0.9
166	83-79-4	Rotenone	0.00162298	0.00181344	0.000167252	0.00181344	4.05289e-13	9.43866e-13	2.55313e-13	8.34624e-12	9.62163e-13	7.59768e-13	7.06677e-13	1.32004e-12	2.19945e-15	0.0359836	0.999999	0.1	0.9
167	94-59-7	Safrole	0.00235682	0.00258588	8.6405e-05	0.00258588	2.45728e-14	1.71544e-13	4.48081e-14	1.44866e-12	1.80907e-12	3.495e-12	1.13817e-13	1.19915e-12	5.7279e-13	0.0595647	0.134388	0.1	0.9
168	28434-00-6	S-Bioallethrin	0.00233799	0.00282982	0.00743811	0.00743811	1.2101e-13	1.86641e-13	6.81746e-14	4.328e-11	2.31767e-12	9.26641e-12	3.38656e-12	9.76553e-13	9.02477e-13	0.240214	0.914734	0.1	0.9
169	1401-55-4	Tannic acid	0.00118885	0.00170663	0.000351456	0.00170663	1.64937e-14	2.1928e-13	8.66741e-14	3.79609e-14	3.36491e-14	3.20591e-13	1.60372e-14	3.25899e-13	4.35132e-17	0.205683	0.123372	0.1	0.9
170	13674-87-8	TDCPP	0.00150569	0.00216317	0.000421198	0.00216317	4.02376e-12	1.28728e-11	5.1993e-13	2.3409e-11	1.58235e-11	9.75676e-12	3.18475e-12	4.81712e-11	3.90355e-13	0.25	0.898849	0.1	0.9
171	107534-96-3	TEBUCONAZOLE	0.00243342	0.00317841	0.00814169	0.00814169	3.7098e-12	1.22386e-11	1.12232e-12	2.1391e-11	7.11449e-11	4.66736e-11	2.66497e-12	1.85041e-11	3.79866e-12	0.170039	0.999161	0.1	0.9
172	119168-77-3	Tebufenpyrad	0.00169395	0.00207198	0.000934221	0.00207198	6.79026e-12	3.81158e-12	8.47064e-13	9.56808e-11	1.13964e-11	2.60198e-11	7.87074e-12	4.68592e-12	1.45311e-12	0.125767	0.999969	0.1	0.9
173	7696-12-0	Tetramethrin	0.00163616	0.00244755	0.00228272	0.00244755	8.80336e-14	6.67426e-13	6.11202e-14	4.46453e-11	8.56361e-12	2.14648e-11	3.86149e-12	1.35202e-12	3.97576e-12	0.171485	0.295961	0.1	0.9
174	117718-60-2	Thiazopyr	0.00162454	0.00242355	0.00520428	0.00520428	1.72187e-12	1.28972e-11	5.02126e-13	2.84288e-11	2.90322e-12	1.87435e-12	3.45929e-12	1.31269e-11	2.02912e-14	0.00339576	0.114805	0.1	0.9
175	94-28-0	Tri(ethylene glycol) bis(2-ethylhexanoate)	0.00163807	0.00160512	0.00531487	0.00531487	1.07184e-12	5.00444e-13	9.25686e-14	2.9885e-11	1.04432e-13	1.15483e-12	1.26287e-12	5.54947e-14	3.91125e-13	0.25	0.995649	0.1	0.9
176	126-73-8	Tributyl phosphate	0.00227681	0.00288042	0.0109687	0.0109687	1.29242e-13	1.97114e-12	4.00074e-14	1.1935e-12	1.10477e-13	5.14274e-13	7.85952e-14	2.0225e-13	2.72558e-14	0.124275	0.288834	0.1	0.9
177	24602-86-6	Tridemorph	0.00193591	0.00233438	0.0268202	0.0268202	1.11493e-12	3.38882e-12	9.0364e-14	1.77974e-10	4.66123e-12	7.45374e-12	6.58155e-12	5.63068e-14	2.60148e-13	0.0399907	0.55144	0.1	0.9
178	115-86-6	TRIPHENYL PHOSPHATE	0.00161669	0.00251985	0.000717509	0.00251985	1.27932e-12	1.72322e-11	2.06837e-13	1.76848e-11	9.41845e-13	4.84606e-12	1.47186e-12	7.61064e-13	1.10044e-13	0.109357	0.164654	0.1	0.9
179	1929-77-7	Vernolate	0.00236151	0.00238237	0.00438989	0.00438989	6.0123e-14	3.43408e-13	6.21422e-14	3.44893e-12	6.93023e-13	1.76465e-12	2.66565e-13	1.58582e-12	1.27039e-12	0.00799728	0.0697083	0.1	0.9
180	156052-68-5	Zoxamide	0.0019217	0.00249243	0.000858243	0.00249243	3.85199e-12	1.12538e-11	1.55475e-12	2.29585e-11	2.83395e-11	3.51688e-11	2.71792e-12	1.55948e-11	1.13429e-11	0.240784	0.999732	0.1	0.9
		max	0.0228378	0.0217602	0.03863	0.03863	1.2086e-10	1.7322e-09	4.32283e-11	1.01461e-09	2.34098e-08	2.99779e-09	6.19211e-11	3.61358e-10	6.00983e-11	0.250226	1		max
		min	0.00118885	0.00137235	8.59763e-05	0.00143687	5.31619e-15	2.09471e-14	1.74016e-14	3.79609e-14	3.63199e-15	2.41556e-13	1.53257e-14	8.59955e-17	4.35132e-17	2.79583e-05	0.000853635		min
		median	0.00233799	0.00282982	0.00311572	0.00500154	4.26814e-13	1.14538e-12	1.44151e-13	5.36843e-12	2.4674e-12	5.92901e-12	7.49237e-13	2.34865e-12	5.1166e-13	0.142366	0.56982		median
		95th percentile	0.00852222	0.0124327	0.0269769	0.0269769	1.33355e-11	4.8201e-11	1.80065e-12	6.13838e-10	2.44324e-09	2.09375e-10	3.19145e-11	4.01e-11	8.27117e-12	0.25	0.99997		95th percentile
		90th percentile	0.00405422	0.0108753	0.0220608	0.0228403	6.03229e-12	1.72746e-11	8.99807e-13	2.03332e-10	2.12669e-10	7.40836e-11	1.6274e-11	1.58857e-11	4.87381e-12	0.25	0.999222		90th percentile
